# Supplementary material for: Autoantibodies from long-lived ‘memory’ plasma cells of NZB/W mice drive immune complex nephritis
Source: HighWire-hosted journal article supplement (doi:10.1136/annrheumdis-2013-203455), 2013-10-11
Supplement: annrheumdis-2013-203455supp_figure.pdf [file annrheumdis-2013-203455supp_figure.pdf]

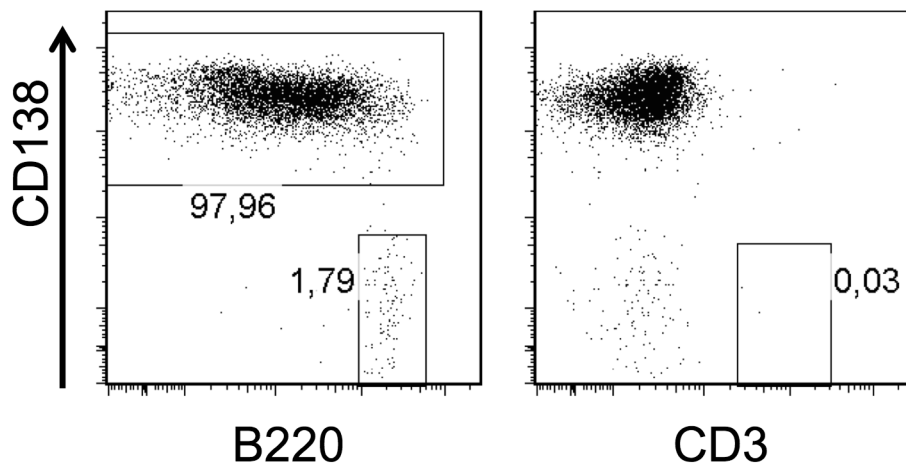

**Supplementary figure:** the purity of CD138+ ASCs isolated from the spleens of NZB/W mice and Balb/c mice immunized with OVA by MACS was checked by FACS. The graphs show a typical example of the high purity of the CD138+ cells (about 98%). The low-level contamination (about 2%) was mainly due to B220+ B cells, while CD3+ T cells were barely detectable.
